# Supplementary material for: Adaptive Evolution and the Birth of CTCF Binding Sites in the Drosophila Genome
Source: PubMed Central journal article supplement (PMC3491045; doi:10.1371/journal.pbio.1001420), 2012-11-06

Figure S6

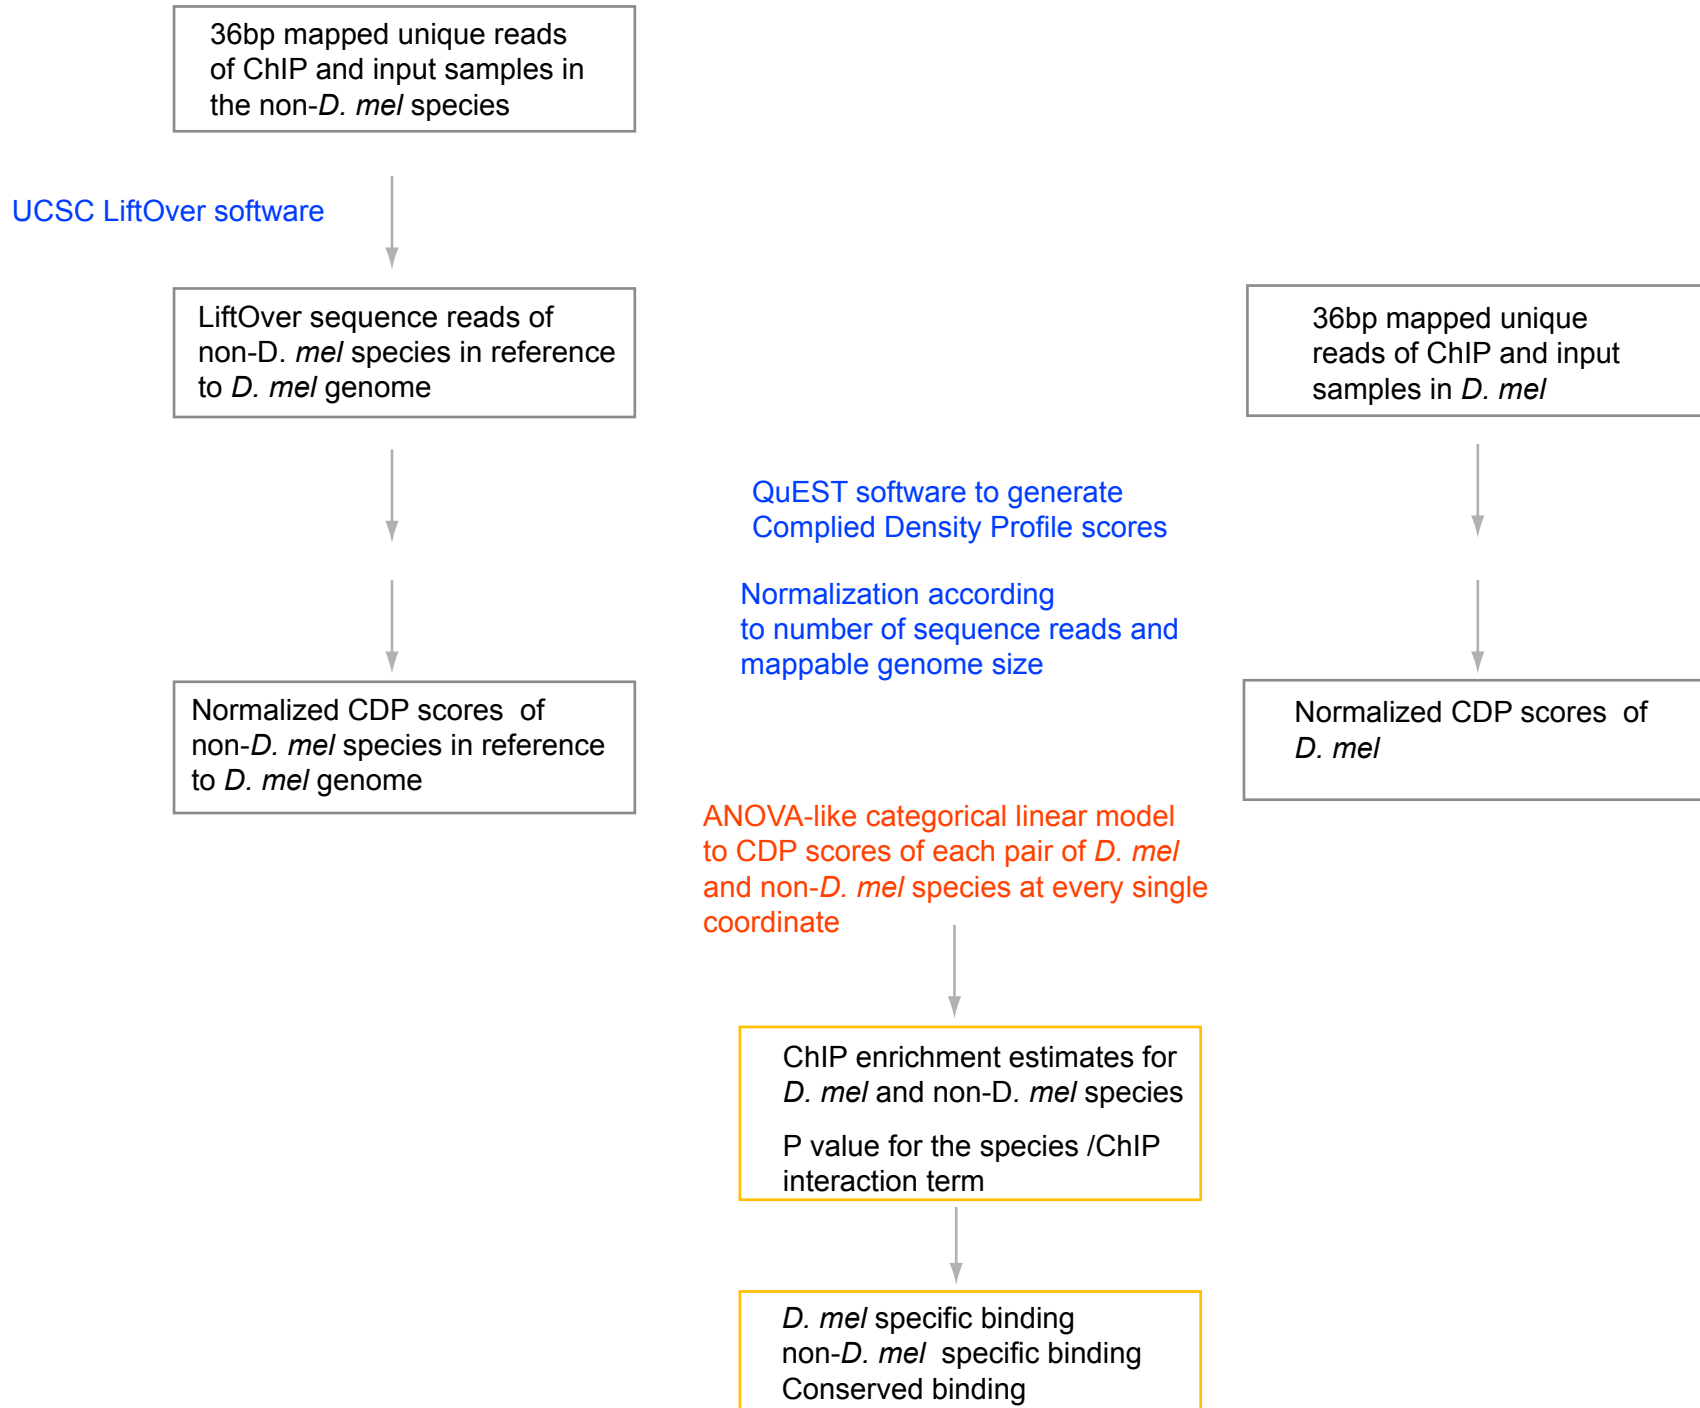

Supplement: pbio.1001420.s006.pdf [file pbio.1001420.s006.pdf]
