# Supplementary material for: Adaptive Evolution and the Birth of CTCF Binding Sites in the Drosophila Genome
Source: PubMed Central journal article supplement (PMC3491045; doi:10.1371/journal.pbio.1001420), 2012-11-06
Supplement: pbio.1001420.s021.pdf [file pbio.1001420.s021.pdf]

## Supporting Tables

### Table S1: Summary of Sequence Reads

Table S1A: Number of Solexa sequence reads for ChIP-seq experiments

| Species                | Sample | No. of unique reads<br>(in million) | Genome Coverage |
|------------------------|--------|-------------------------------------|-----------------|
| <i>D.melanogaster</i>  | CTCF1  | 5.59                                | 1.68            |
| <i>D.melanogaster</i>  | CTCF2  | 5.74                                | 1.72            |
| <i>D.melanogaster</i>  | CTCF3  | 4.44                                | 1.33            |
| <i>D.melanogaster</i>  | Input1 | 7.24                                | 2.17            |
| <i>D.melanogaster</i>  | Input2 | 6.57                                | 1.97            |
| <i>D.melanogaster</i>  | Input3 | 7.3                                 | 2.19            |
| <i>D.simulans</i>      | CTCF1  | 5.13                                | 1.68            |
| <i>D.simulans</i>      | CTCF2  | 2.96                                | 0.97            |
| <i>D.simulans</i>      | CTCF3  | 6.82                                | 2.24            |
| <i>D.simulans</i>      | Input1 | 6.26                                | 2.05            |
| <i>D.simulans</i>      | Input2 | 6.26                                | 2.05            |
| <i>D.simulans</i>      | Input3 | 9.41                                | 3.09            |
| <i>D.yakuba</i>        | CTCF1  | 4.38                                | 1.32            |
| <i>D.yakuba</i>        | CTCF2  | 6.32                                | 1.90            |
| <i>D.yakuba</i>        | CTCF3  | 5.75                                | 1.73            |
| <i>D.yakuba</i>        | Input1 | 7.55                                | 2.27            |
| <i>D.yakuba</i>        | Input2 | 7.55                                | 2.27            |
| <i>D.yakuba</i>        | Input3 | 7.55                                | 2.27            |
| <i>D.pseudoobscura</i> | CTCF1  | 6.11                                | 1.73            |
| <i>D.pseudoobscura</i> | CTCF2  | 7.59                                | 2.15            |
| <i>D.pseudoobscura</i> | CTCF3  | 7.48                                | 2.12            |
| <i>D.pseudoobscura</i> | Input1 | 7.06                                | 2.00            |
| <i>D.pseudoobscura</i> | Input2 | 7.06                                | 2.00            |
| <i>D.pseudoobscura</i> | Input3 | 8.37                                | 2.37            |

Note: Column 3 "No. of unique reads" summarizes the number of sequence reads that are uniquely mapped to certain genome position allowing at most two mismatches. Column 4 "Genome Coverage" are calculated as the read length (36) multiplies the number of unique reads divided by the number of total nucleotides in each sequenced genome .

Table S1B: Number of LiftOver reads of non-*D.melanogaster* species

| <i>Species</i>         | <i>Sample</i> | <i>No. of LiftOver reads<br/>( in million )</i> |
|------------------------|---------------|-------------------------------------------------|
| <i>D.simulans</i>      | CTCF1         | 5.02                                            |
| <i>D.simulans</i>      | CTCF2         | 2.89                                            |
| <i>D.simulans</i>      | CTCF3         | 6.71                                            |
| <i>D.simulans</i>      | input1        | 6.1                                             |
| <i>D.simulans</i>      | input2        | 6.1                                             |
| <i>D.simulans</i>      | input3        | 9.26                                            |
| <i>D.yakuba</i>        | CTCF1         | 4.1                                             |
| <i>D.yakuba</i>        | CTCF2         | 5.94                                            |
| <i>D.yakuba</i>        | CTCF3         | 5.3                                             |
| <i>D.yakuba</i>        | input1        | 7.03                                            |
| <i>D.yakuba</i>        | input2        | 7.03                                            |
| <i>D.yakuba</i>        | input3        | 7.03                                            |
| <i>D.pseudoobscura</i> | CTCF1         | 4.75                                            |
| <i>D.pseudoobscura</i> | CTCF2         | 5.62                                            |
| <i>D.pseudoobscura</i> | CTCF3         | 5.11                                            |
| <i>D.pseudoobscura</i> | input1        | 5.68                                            |
| <i>D.pseudoobscura</i> | input2        | 5.68                                            |
| <i>D.pseudoobscura</i> | input3        | 6.81                                            |

Table S1C: Number of Solexa Sequencing reads for RNA-seq experiments

| <b>Species</b>        | <b>Sample</b> | <b>Number of unique reads mapped to Flybase annotated gene coding regions (in million)</b> |
|-----------------------|---------------|--------------------------------------------------------------------------------------------|
| <i>D.melanogaster</i> | WPP1          | 15.53                                                                                      |
| <i>D.melanogaster</i> | WPP2          | 16.77                                                                                      |
| <i>D.melanogaster</i> | WPP3          | 12.58                                                                                      |
| <i>D.simulans</i>     | WPP1          | 15.98                                                                                      |
| <i>D.simulans</i>     | WPP2          | 11.75                                                                                      |
| <i>D.simulans</i>     | WPP3          | 9.25                                                                                       |
| <i>D.yakuba</i>       | WPP1          | 14.80                                                                                      |
| <i>D.yakuba</i>       | WPP2          | 13.37                                                                                      |
| <i>D.yakuba</i>       | WPP3          | 12.60                                                                                      |
