# Supplementary material for: Adaptive Evolution and the Birth of CTCF Binding Sites in the Drosophila Genome
Source: PubMed Central journal article supplement (PMC3491045; doi:10.1371/journal.pbio.1001420), 2012-11-06
Supplement: pbio.1001420.s029.pdf [file pbio.1001420.s029.pdf]

**Table S9: Twist Binding divergence estimated using our pipeline**

| All Binding Events |                          |                    |                       |                                      |                    |                    |
|--------------------|--------------------------|--------------------|-----------------------|--------------------------------------|--------------------|--------------------|
| Total              | Species A binding events |                    |                       |                                      | Species B specific | Binding divergence |
|                    | All                      | Species A specific | Shared with Species B | Species A centric binding divergence |                    |                    |
| 5320               | 5196                     | 2061               | 3135                  | 39.67%                               | 124                | 41.07%             |
| 5850               | 5196                     | 1931               | 3265                  | 37.16%                               | 654                | 44.19%             |
| 6825               | 5196                     | 3074               | 2122                  | 59.16%                               | 1629               | 68.91%             |

| Two Way Orthologous Binding Events |                          |                    |                       |                                      |                    |                    |
|------------------------------------|--------------------------|--------------------|-----------------------|--------------------------------------|--------------------|--------------------|
| Total                              | Species A binding events |                    |                       |                                      | Species B specific | Binding divergence |
|                                    | All                      | Species A specific | Shared with Species B | Species A centric binding divergence |                    |                    |
| 5133                               | 5009                     | 1891               | 3118                  | 37.75%                               | 124                | 39.26%             |
| 5812                               | 5158                     | 1900               | 3258                  | 36.84%                               | 654                | 43.94%             |
| 5512                               | 4072                     | 2172               | 1900                  | 53.34%                               | 1440               | 65.53%             |

| Four Way Orthologous Binding Events |                          |                    |                       |                                      |                    |                    |
|-------------------------------------|--------------------------|--------------------|-----------------------|--------------------------------------|--------------------|--------------------|
| Total                               | Species A binding events |                    |                       |                                      | Species B specific | Binding divergence |
|                                     | All                      | Species A specific | Shared with Species B | Species A centric binding divergence |                    |                    |
| 3932                                | 3920                     | 1446               | 2474                  | 36.89%                               | 12                 | 37.08%             |
| 3995                                | 3920                     | 1427               | 2493                  | 36.40%                               | 75                 | 37.60%             |
| 5303                                | 3920                     | 2086               | 1834                  | 53.21%                               | 1383               | 65.42%             |

Note: We applied our analysis pipeline to the Twist comparative data. Since there are only two ChIP replicates for each species, the data structure of the Twist comparative data is not ideal for applying our methods as the degree of freedom for ANOVA-like linear categorical model part is too small. We have even lower power in detecting non-*D. melanogaster* species binding sites in pair wise comparisons.
