# Supplementary material for: Adaptive Evolution and the Birth of CTCF Binding Sites in the Drosophila Genome
Source: PubMed Central journal article supplement (PMC3491045; doi:10.1371/journal.pbio.1001420), 2012-11-06
Supplement: pbio.1001420.s034.pdf [file pbio.1001420.s034.pdf]

**Table S14: Number of fixed and polymorphic mutations in CTCF associated DNA sequences**

Using *D.simulans* as outgroup

| CTCF associated DNA |                    | Fixed | Polymorphism | F:P  |
|---------------------|--------------------|-------|--------------|------|
|                     | all binding        | 27465 | 11435        | 2.40 |
|                     | TWOB               | 26538 | 11341        | 2.34 |
|                     | Conserved TWOB     | 21110 | 9411         | 2.24 |
| 201bp region        | Diverged TWOB      | 5428  | 1930         | 2.81 |
|                     | FWOB               | 8610  | 4841         | 1.78 |
|                     | Old FWOB           | 5926  | 3543         | 1.67 |
|                     | Young FWOB         | 965   | 396          | 2.44 |
|                     |                    |       |              |      |
|                     | all binding        | 4648  | 2221         | 2.09 |
|                     | TWOB               | 4588  | 2214         | 2.07 |
|                     | Conserved TWOB     | 3713  | 1865         | 1.99 |
| motif region        | Diverged TWOB      | 875   | 349          | 2.51 |
|                     | FWOB               | 1619  | 1005         | 1.61 |
|                     | Old FWOB           | 1132  | 743          | 1.52 |
|                     | Young FWOB         | 170   | 57           | 2.98 |
|                     |                    |       |              |      |
| Neutral control     | Syn sites of genes | 67149 | 36385        | 1.85 |

Using *D.yakuba* as outgroup

| CTCF Associated DNA |                    | Fixed  | Polymorphism | F:P  |
|---------------------|--------------------|--------|--------------|------|
|                     | all binding        | 59994  | 11480        | 5.23 |
|                     | TWOB               | 57187  | 11035        | 5.18 |
|                     | Conserved TWOB     | 40576  | 8441         | 4.81 |
| 201bp region        | Diverged TWOB      | 18090  | 2929         | 6.18 |
|                     | FWOB               | 19106  | 4787         | 3.99 |
|                     | Old FWOB           | 13361  | 3504         | 3.81 |
|                     | Young FWOB         | 1976   | 388          | 5.09 |
|                     |                    |        |              |      |
|                     | all binding        | 10219  | 2241         | 4.56 |
|                     | TWOB               | 9792   | 2160         | 4.53 |
|                     | Conserved TWOB     | 7024   | 1694         | 4.15 |
| motif region        | Diverged TWOB      | 3067   | 538          | 5.70 |
|                     | FWOB               | 3638   | 966          | 3.77 |
|                     | Old FWOB           | 2554   | 736          | 3.47 |
|                     | Young FWOB         | 332    | 56           | 5.93 |
|                     |                    |        |              |      |
| Neutral control     | Syn sites of genes | 182759 | 46702        | 3.91 |

Note: From the "F:P" values , we observe that the strength of positive selection in the CTCF-201bp sites is stronger than in CTCF-motif sites. There are two factors contributing to the increasing strength in the 201bp sites than the motif sites: 1) we used the position weight matrix of the 9bp core motif to find motif matches in the binding region. While the core motif contains most information in the 13~15bp enriched motif for *Drosophila* CTCF, the sequence itself is also more constrained; the greater number of fixed sites could come from the other less constrained motif sequences. 2) In *Drosophila*, different insulator proteins have a genome wide trend to

cluster in similar genomic regions, the higher positive selection strength in the binding region could result from selection on other insulator protein binding sites.
