# Supplementary material for: Adaptive Evolution and the Birth of CTCF Binding Sites in the Drosophila Genome
Source: PubMed Central journal article supplement (PMC3491045; doi:10.1371/journal.pbio.1001420), 2012-11-06
Supplement: pbio.1001420.s037.pdf [file pbio.1001420.s037.pdf]

**Table S17:HKA test for Old and Young high sequence coverage sites**

| Species            | Groups compared | Polymorphism |          | Divergence |          | Sum of Deviations (X <sup>2</sup> ) | P value     |
|--------------------|-----------------|--------------|----------|------------|----------|-------------------------------------|-------------|
|                    |                 | Observed     | Expected | Observed   | Expected |                                     |             |
| <i>D.mel/Dsim</i>  | Old             | 3377         | 3289.8   | 5416       | 5503.2   | 996.5                               | P<0.001     |
|                    | Young           | 351          | 438.6    | 810        | 722.4    |                                     |             |
|                    | Old             | 3377         | 3395.1   | 5416       | 5397.9   | 1124.6                              | 0.15<P<0.19 |
|                    | Small intron    | 1147         | 1128.8   | 1886       | 1904.2   |                                     |             |
|                    | Young           | 351          | 370.9    | 810        | 790.1    |                                     |             |
|                    | Small intron    | 124          | 104.1    | 215        | 234.9    |                                     |             |
| <i>D.mel/D.yak</i> | Old             | 3386         | 3310.1   | 12256      | 12332.0  | 1071.0                              | P<0.001     |
|                    | Young           | 352          | 428.2    | 1647       | 1570.8   |                                     |             |
|                    | Old             | 3386         | 3407.8   | 12256      | 12234.2  | 1334.2                              | 0.03<P<0.04 |
|                    | Small intron    | 1099         | 1076.7   | 4115       | 4137.3   |                                     |             |
|                    | Young           | 352          | 404.1    | 1647       | 1594.9   |                                     |             |
|                    | Small intron    | 116          | 110.9    | 469        | 474.2    |                                     |             |

Note: the observed and expected number of polymorphic and divergence sites are summarized over all sites within each group, while the value of sum of deviation (X<sup>2</sup>) is calculated by adding values of deviation for each loci together. The P value is calculated based on 1000 iterations of colacence simulation. All results shown here are obtained after filtering sites with input sequence coverage <0.5. When compared to Old sites and neutral small introns, the group of Young sites show significant reduced polymorphism, suggesting directional positive selection on them.
