# Supplementary material for: Adaptive Evolution and the Birth of CTCF Binding Sites in the Drosophila Genome
Source: PubMed Central journal article supplement (PMC3491045; doi:10.1371/journal.pbio.1001420), 2012-11-06
Supplement: pbio.1001420.s038.pdf [file pbio.1001420.s038.pdf]

**Table S18: Overlapping of CTCF binding sites with Transposable Elements**

|                           | All   | <i>D. mel</i> lineage specific sites | other sites |
|---------------------------|-------|--------------------------------------|-------------|
| Overlapping with TE       | 27    | 15                                   | 12          |
| Not overlapping with TE   | 2240  | 246                                  | 1994        |
| Total                     | 2267  | 261                                  | 2006        |
| Percentage of overlapping | 1.19% | 5.75%                                | 0.60%       |

Note: We used the CTCF-201bp sites to identify the number of sites overlapping with annotated transposable elements in *Drosophila melanogaster* genome.
