# Supplementary material for: Adaptive Evolution and the Birth of CTCF Binding Sites in the Drosophila Genome
Source: PLOS journal article supplement (doi:10.1371/journal.pbio.1001420), 2012-11-06

Figure S1

A

*D.mel* C terminus

VDGASQEFLQLMDMIEQDS

*D.sim* C terminus

VDGASQEFLQLMDMIEQDS

*D.yak* C terminus

VDGASQEFLQLMDMIEQDS

*D.pse* C terminus

MDGTSQEFLQLMDMIEQDA

B

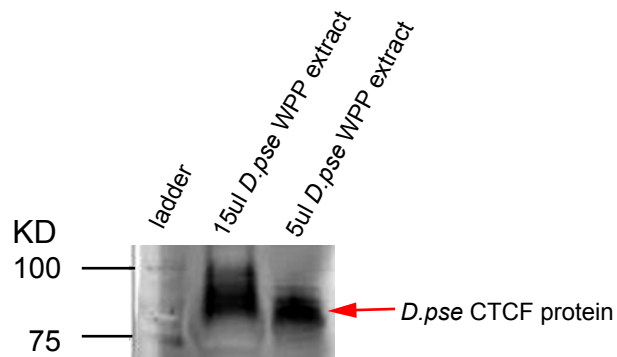

Supplement: S1 (10.1371/journal.pbio.1001420.s001) [file journal.pbio.1001420.s001.pdf › journal.pbio.1001420.s001.pdf]
