# Supplementary material for: Adaptive Evolution and the Birth of CTCF Binding Sites in the Drosophila Genome
Source: PLOS journal article supplement (doi:10.1371/journal.pbio.1001420), 2012-11-06
Supplement: S4 (10.1371/journal.pbio.1001420.s004) [file journal.pbio.1001420.s004.pdf › journal.pbio.1001420.s004.pdf]

Figure S4

A

*D.melanogaster*

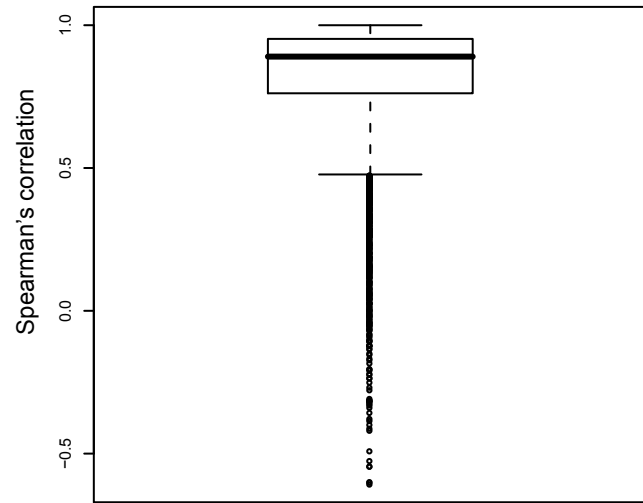

median spearman's rank correlation= 0.89

B

*D.simulans*

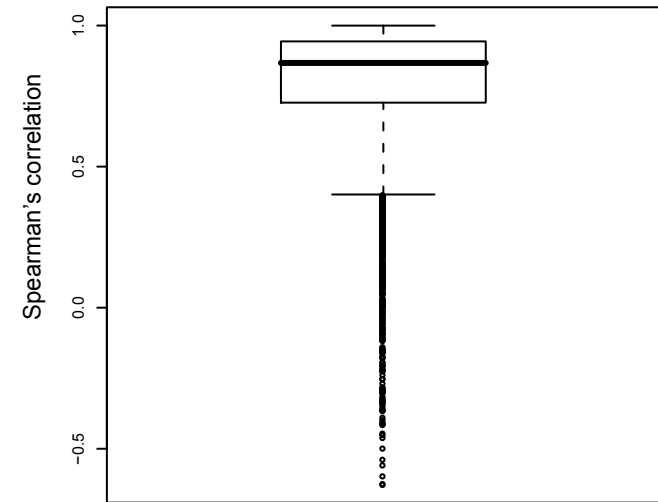

median spearman's rank correlation= 0.87

C

*D.yakuba*

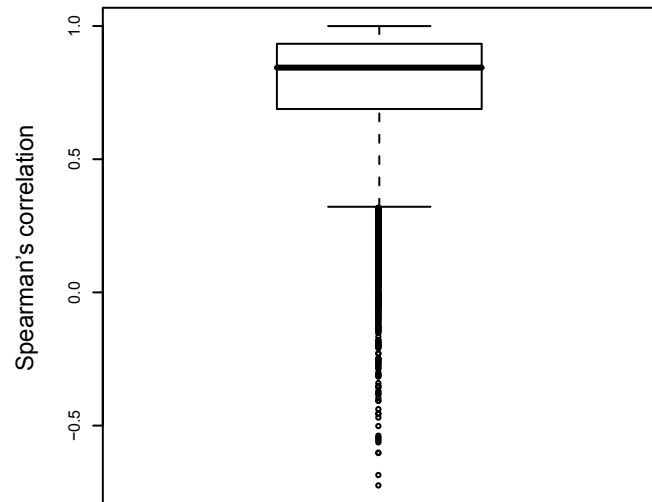

median spearman's rank correlation= 0.84

D

*D.pseudoobscura*

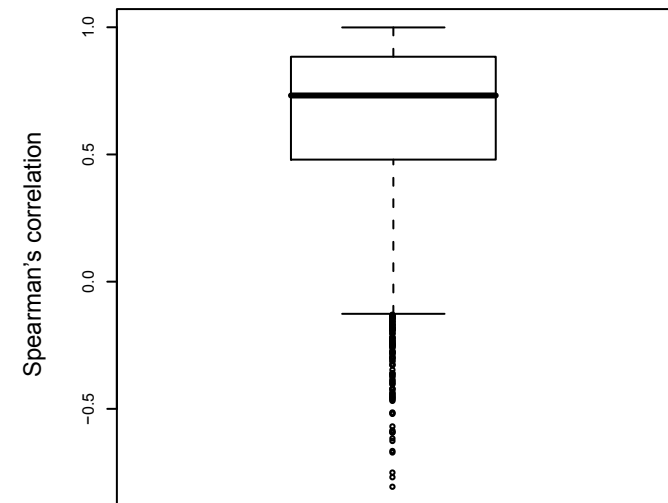

median spearman's rank correlation= 0.71
