# Supplementary material for: Adaptive Evolution and the Birth of CTCF Binding Sites in the Drosophila Genome
Source: PLOS journal article supplement (doi:10.1371/journal.pbio.1001420), 2012-11-06
Supplement: S5 (10.1371/journal.pbio.1001420.s005) [file journal.pbio.1001420.s005.pdf › journal.pbio.1001420.s005.pdf]

Figure S5

*D.mel* CTCF DBD YSCPHCPYTASKKFLI TRHSRSHDVEPSFKCSI CERSFRSNVGLQNH I NTHMGNKPHKCKLCESAFTTSGELVRHTRYKHTKEKPHKCTECTYASVELTK  
*D.sim* CTCF DBD YSCPHCPYTASKKFLI TRHSRSHDVEPSFKCSI CERSFRSNVGLQNH I NTHMGNKPHKCKLCESAFTTSGELVRHTRYKHTKEKPHKCTECTYASVELTK  
*D.yak* CTCF DBD YSCPHCPYTANKKFLI TRHSRSHDVEPSFKCSI CERSFRSNVGLQNHVNTHMGNKPHKCKLCESAFTTSGELVRHTRYKHTKEKPHKCTECTYASVELTK  
*D.pse* CTCF DBD FNCSCAYT TNKKFLI TRHNKTHEDFSFKCSI CDRGFKSNVGL VNHVNTHLGNKPHKCKHCESAFVTSGEL I RHTRYKHTKEKPHKCTECSYASVELTK

*D.mel* CTCF DBD LRRHMTCHTGERPYQCPHCTYASQDMFKLKRHMVI HTGEKKYQCDI CKSRFTQSNLKAHKL I HSVVDKPVFQCNYCPTTCGRKADLRVHI KHMHTSDVP  
*D.sim* CTCF DBD LRRHMTCHTGERPYQCPHCTYASQDMFKLKRHMVI HTGEKKYQCDI CKSRFTQSNLKAHKL I HSVVDKPVFQCNYCPTTCGRKADLRVHI KHMHTSDVP  
*D.yak* CTCF DBD LRRHMTCHTGERPYQCPHCTYASQDMFKLKRHMVI HTGEKKYQCDI CKSRFTQSNLKAHKL I HSVVDKPVFQCNYCPTTCGRKADLR I HI KHMHTSDVP  
*D.pse* CTCF DBD LRRHMTCHTGERPYQCPHCTYASQDMFKLKRHLV VHTGEKRYQCDI CKSRFTQSNLKAHKL I HSVVDKPVFQC SHCPTTCGRKADLR LHVMMHTADKP

*D.mel* CTCF DBD MTCRRCGQQL PDRYQYKL HVKSHEGEKCYSCKLCSYASVTQRHLASHML I HLDEKPFHCDQCPQAFRQRQL LRRHMNLVHNEEYQPPEPREKLHKCPSCP  
*D.sim* CTCF DBD ITCRRCGQQL PDRYQYKL HVKSHEGEKCYSCKLCSYASVTQRHLASHML I HLDEKPFHCDQCPQAFRQRQL LRRHMNLVHNEEYQPPEPREKLHKCPSCP  
*D.yak* CTCF DBD ITCRRCGQQL PDRYQYKL HVKSHEGEKCYSCKLCSYASVTQRHLASHML I HLDEKPFHCEQCPQAFRQRQL LRRHMNLVHNEEYQPPAPRAKLHKCPSCP  
*D.pse* CTCF DBD I PCKRCGQNL PDRYQYKL HI KTHEGEFCYRCKLC EYASVSQRHL DSHML VHLDAKPFKCEVCPQAFRQRQL LRRHMNLVHNEEYTRPEPREKMHSCEP

*D.mel* CTCF DBD REFTHKGNLMRHMETH  
*D.sim* CTCF DBD REFTHKGNLMRHMETH  
*D.yak* CTCF DBD REFTHKGNLMRHMEI H  
*D.pse* CTCF DBD RI FTHKGNL I RHMEI H
