# Supplementary material for: Adaptive Evolution and the Birth of CTCF Binding Sites in the Drosophila Genome
Source: PLOS journal article supplement (doi:10.1371/journal.pbio.1001420), 2012-11-06

Figure S7

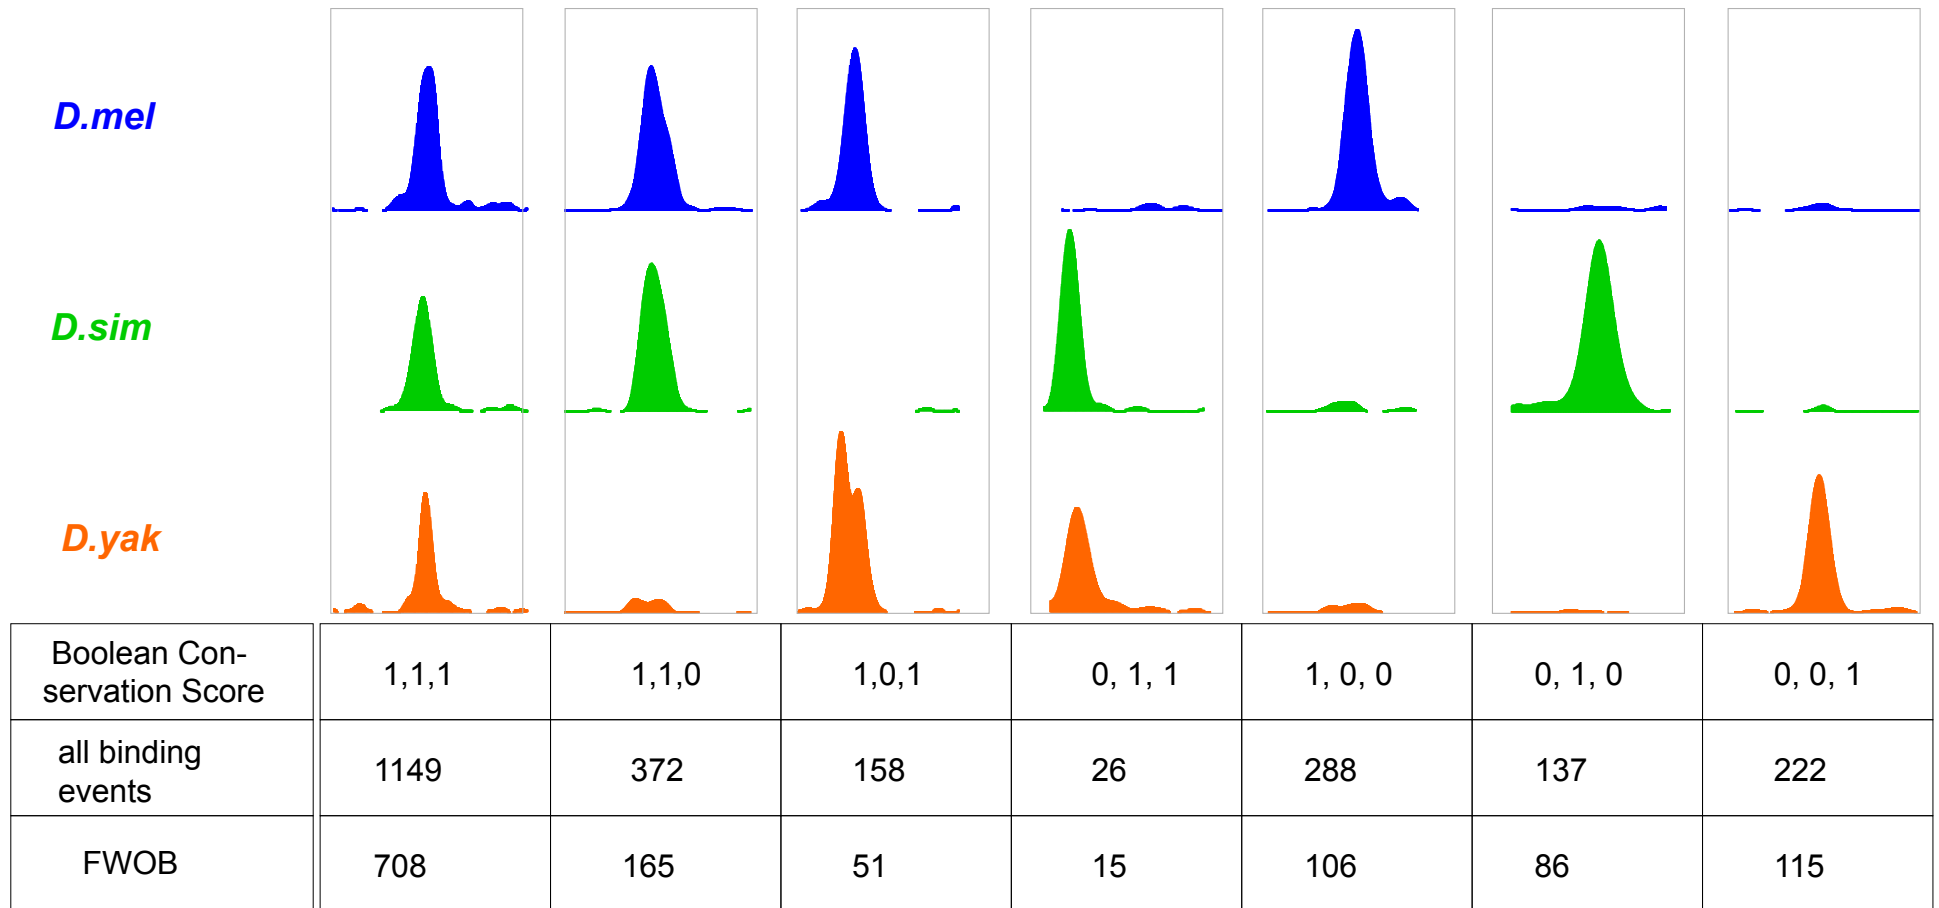

Supplement: S7 (10.1371/journal.pbio.1001420.s007) [file journal.pbio.1001420.s007.pdf › journal.pbio.1001420.s007.pdf]
