# Supplementary material for: Adaptive Evolution and the Birth of CTCF Binding Sites in the Drosophila Genome
Source: PLOS journal article supplement (doi:10.1371/journal.pbio.1001420), 2012-11-06

Figure S11

**A**

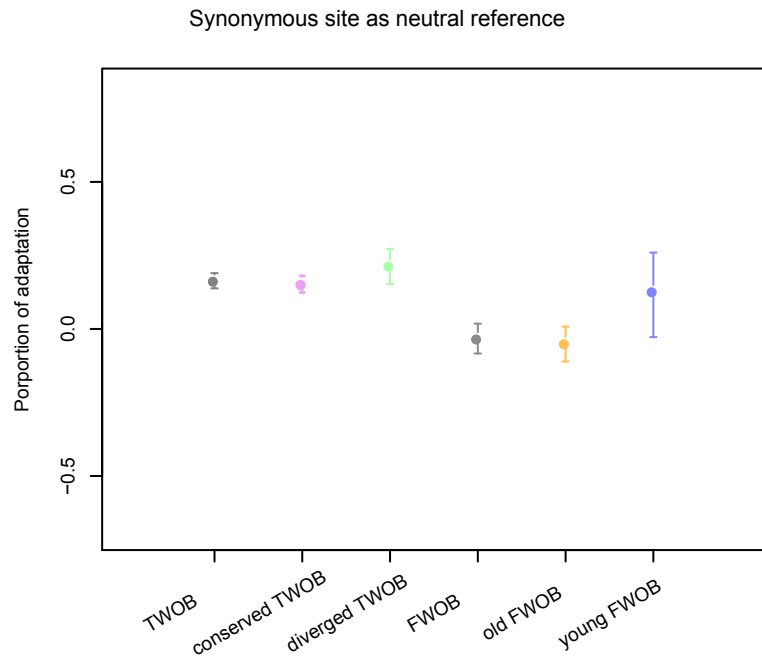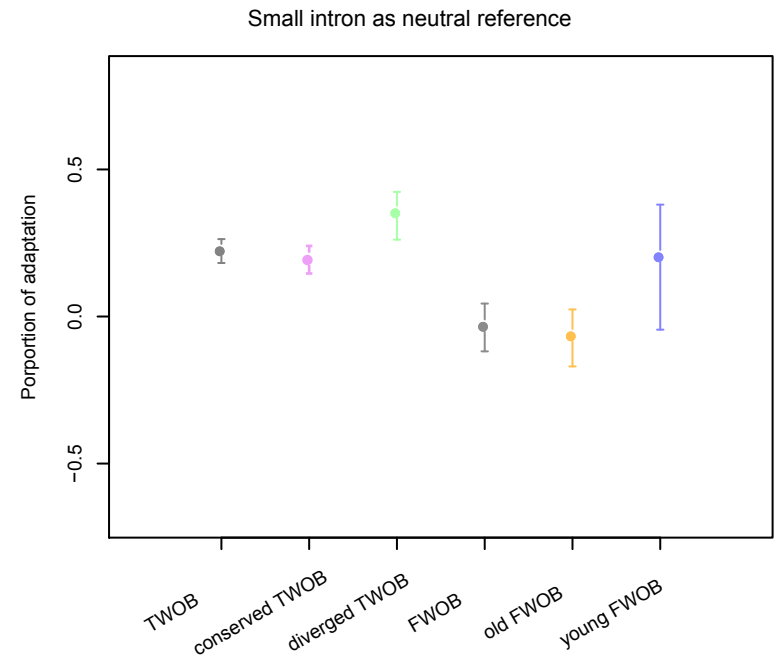

**B**

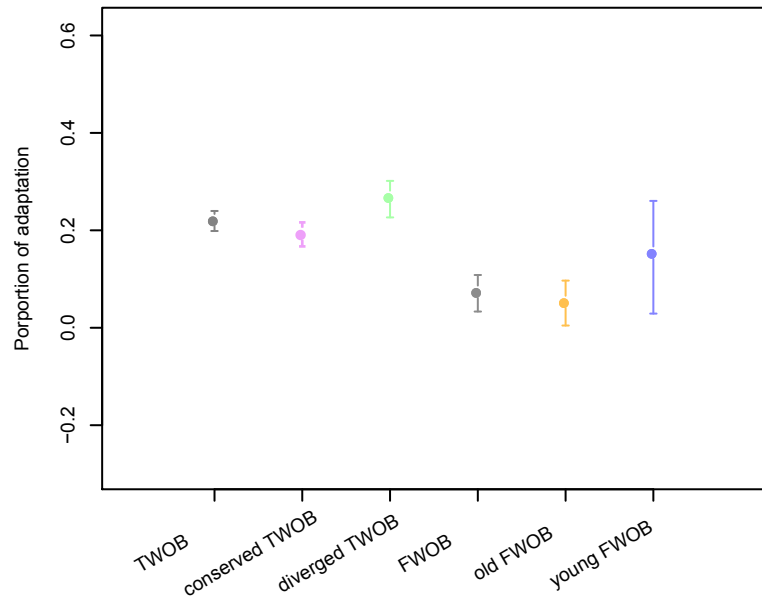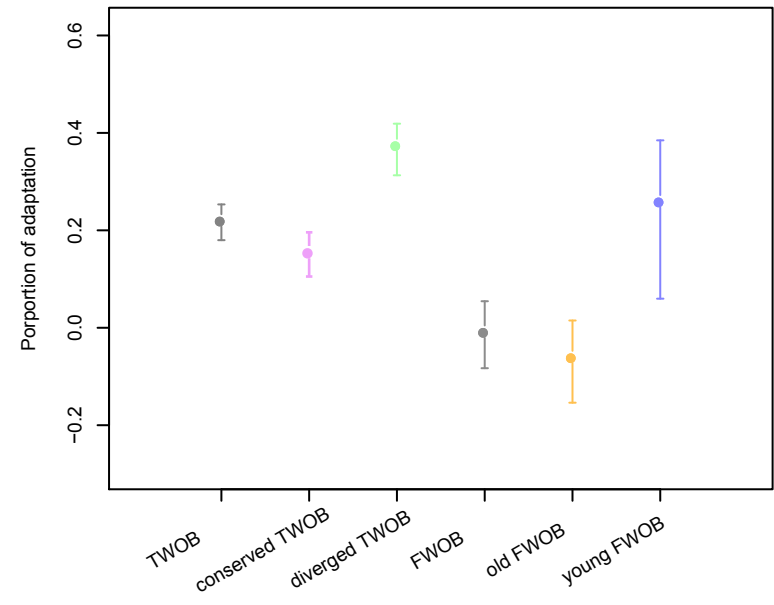

Supplement: S11 (10.1371/journal.pbio.1001420.s011) [file journal.pbio.1001420.s011.pdf › journal.pbio.1001420.s011.pdf]
