# Supplementary material for: Adaptive Evolution and the Birth of CTCF Binding Sites in the Drosophila Genome
Source: PLOS journal article supplement (doi:10.1371/journal.pbio.1001420), 2012-11-06
Supplement: S14 (10.1371/journal.pbio.1001420.s014) [file journal.pbio.1001420.s014.pdf › journal.pbio.1001420.s014.pdf]

Figure S14

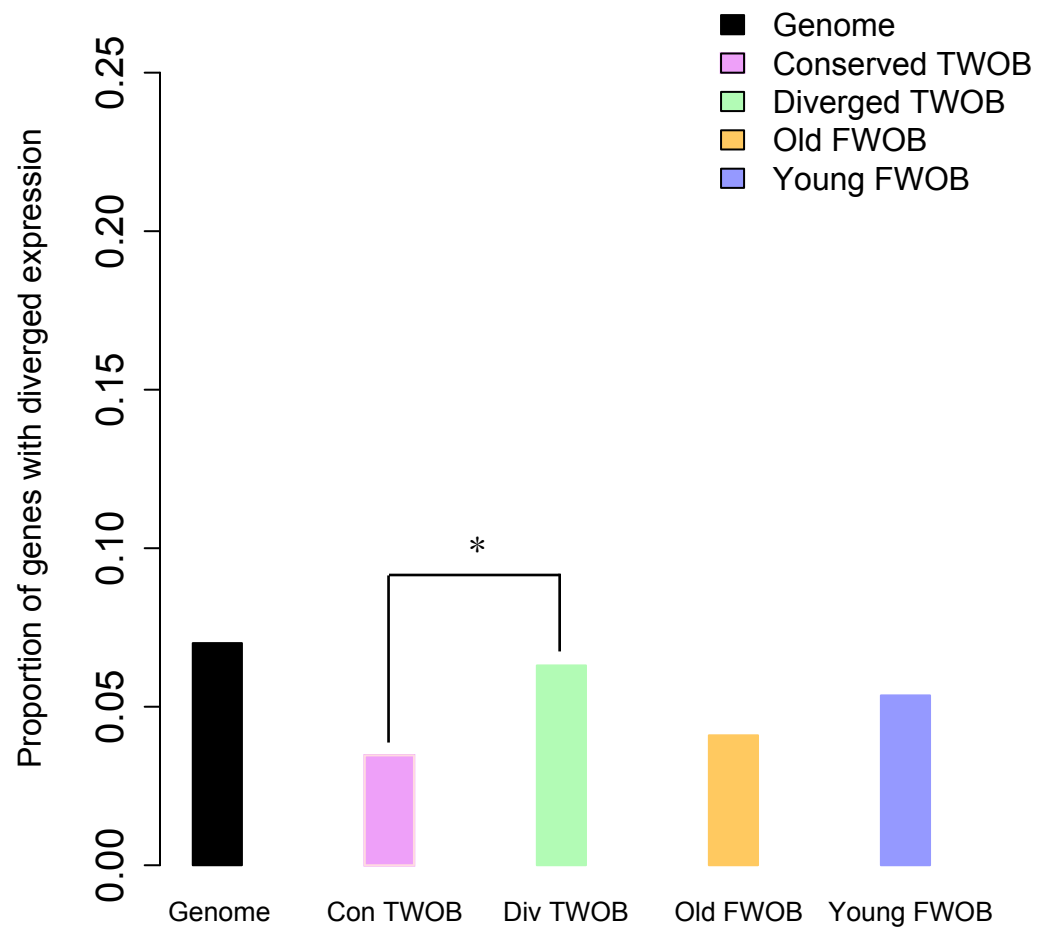

|                      |      |      |     |     |    |
|----------------------|------|------|-----|-----|----|
| Diverged Expression  | 563  | 38   | 15  | 15  | 3  |
| Conserved Expression | 7472 | 1059 | 223 | 351 | 53 |
