# Supplementary material for: Adaptive Evolution and the Birth of CTCF Binding Sites in the Drosophila Genome
Source: PLoS Biol. 2012 Nov 6;10(11):e1001420. doi: 10.1371/journal.pbio.1001420 (PMC3491045; doi:10.1371/journal.pbio.1001420)
Supplement: Table S2 — Ka/Ks ratio for CTCF gene in Drosophila species. (PDF) [file pbio.1001420.s022.pdf]

**Table S2: Ka/Ks ratio for CTCF gene in *Drosophila* species**

|                        |       |       |       |       |
|------------------------|-------|-------|-------|-------|
| <i>D.melanogaster</i>  |       | 0.123 | 0.106 | 0.137 |
| <i>D.simulans</i>      | 0.013 |       | 0.133 | 0.151 |
| <i>D.yakuba</i>        | 0.044 | 0.058 |       | 0.147 |
| <i>D.pseudoobscura</i> | 0.072 | 0.080 | 0.094 |       |

Upper right: Ka/Ks ratio for the whole gene ( in green ).

Lower left: Ka/Ks ratio for the predicted DNA binding domain ( in pink).
