# Supplementary material for: Adaptive Evolution and the Birth of CTCF Binding Sites in the Drosophila Genome
Source: PLoS Biol. 2012 Nov 6;10(11):e1001420. doi: 10.1371/journal.pbio.1001420 (PMC3491045; doi:10.1371/journal.pbio.1001420)
Supplement: Table S3 — CTCF binding site motif enrichment in each species. (PDF) [file pbio.1001420.s023.pdf]

**Table S3: CTCF Binding site motif enrichment in each species**

| Species      | Motif searching Pvalue cutoff | ChIP enriched sites | Simulated sites |        | Fold enrichment (X) | Z test      |         |
|--------------|-------------------------------|---------------------|-----------------|--------|---------------------|-------------|---------|
|              |                               |                     | mean            | s.d.   |                     | Z statistic | pvalue  |
| <i>D.mel</i> | 1.00E-02                      | 98.90%              | 96.10%          | 0.0059 | 1.03                | 15.138      | <0.0001 |
|              | 5.00E-03                      | 92.00%              | 81.70%          | 0.0073 | 1.126               | 44.712      | <0.0001 |
|              | 1.00E-03                      | 65.00%              | 31.50%          | 0.0169 | 2.063               | 62.729      | <0.0001 |
|              | 5.00E-04                      | 56.20%              | 19.00%          | 0.0114 | 2.951               | 103.021     | <0.0001 |
|              | 1.00E-04                      | 42.70%              | 4.30%           | 0.006  | 9.873               | 200.774     | <0.0001 |
| <i>D.sim</i> | 1.00E-02                      | 98.70%              | 87.50%          | 0.0052 | 1.128               | 68.84       | <0.0001 |
|              | 5.00E-03                      | 93.60%              | 74.30%          | 0.0124 | 1.261               | 49.525      | <0.0001 |
|              | 1.00E-03                      | 66.30%              | 30.70%          | 0.0085 | 2.158               | 132.689     | <0.0001 |
|              | 5.00E-04                      | 56.60%              | 19.10%          | 0.0084 | 2.971               | 142.256     | <0.0001 |
|              | 1.00E-04                      | 40.40%              | 3.90%           | 0.0049 | 10.363              | 237.959     | <0.0001 |
| <i>D.yak</i> | 1.00E-02                      | 98.70%              | 93.00%          | 0.0045 | 1.061               | 40.213      | <0.0001 |
|              | 5.00E-03                      | 92.60%              | 77.90%          | 0.0097 | 1.19                | 48.31       | <0.0001 |
|              | 1.00E-03                      | 60.60%              | 29.30%          | 0.0053 | 2.07                | 187.813     | <0.0001 |
|              | 5.00E-04                      | 49.00%              | 16.20%          | 0.0052 | 3.02                | 197.49      | <0.0001 |
|              | 1.00E-04                      | 34.30%              | 3.90%           | 0.0018 | 8.74                | 524.615     | <0.0001 |
| <i>D.pse</i> | 1.00E-02                      | 98.70%              | 91.90%          | 0.0046 | 1.074               | 46.43       | <0.0001 |
|              | 5.00E-03                      | 92.70%              | 80.40%          | 0.0071 | 1.153               | 54.352      | <0.0001 |
|              | 1.00E-03                      | 61.10%              | 35.40%          | 0.0051 | 1.728               | 159.301     | <0.0001 |
|              | 5.00E-04                      | 48.90%              | 21.20%          | 0.0085 | 2.311               | 103.348     | <0.0001 |
|              | 1.00E-04                      | 32.20%              | 5.30%           | 0.0041 | 6.066               | 205.104     | <0.0001 |

Note: Column 3 shows the percentages of identified CTCF binding sites in each species containing at least one species-specific motif at various P value cutoffs (shown in Column 2). Column 4 summerizse the mean and standard deviation of the percentages

of randomly simulated sites in each species containing at least one species-specific motif at various P value cutoffs based on 10 simulations. For each simulation, we randomly generated the same number of 201bp sites on each chromosome as identified for the CTCF binding sites in each species, and applied exactly same procedure and parameters for motif searching in these sequences. Column 5 shows the fold enrichment of species-specific motif in ChIP identified sites over the randomly simulated sites.
