# Supplementary material for: Adaptive Evolution and the Birth of CTCF Binding Sites in the Drosophila Genome
Source: PLoS Biol. 2012 Nov 6;10(11):e1001420. doi: 10.1371/journal.pbio.1001420 (PMC3491045; doi:10.1371/journal.pbio.1001420)
Supplement: Table S4 — Pearson's correlation coefficients between ChIP replicates. (PDF) [file pbio.1001420.s024.pdf]

**Table S4: Pearson's correlation coefficients between ChIP replicates**

| Species                | rep 1 vs rep2 | rep1 vs rep 3 | rep 2 vs rep 3 | mean |
|------------------------|---------------|---------------|----------------|------|
| <i>D.melanogaster</i>  | 0.90          | 0.95          | 0.89           | 0.91 |
| <i>D.simulans</i>      | 0.98          | 0.83          | 0.84           | 0.88 |
| <i>D.yakuba</i>        | 0.96          | 0.86          | 0.92           | 0.91 |
| <i>D.pseudoobscura</i> | 0.86          | 0.72          | 0.85           | 0.81 |

Note: The genome wide pearson's correlation coefficients between replicates were calculated using raw sequence read counts generated from each ChIP sequence sample, with no additional data normalization.
