# Supplementary material for: Adaptive Evolution and the Birth of CTCF Binding Sites in the Drosophila Genome
Source: PLoS Biol. 2012 Nov 6;10(11):e1001420. doi: 10.1371/journal.pbio.1001420 (PMC3491045; doi:10.1371/journal.pbio.1001420)
Supplement: Table S5 — Diverged and conserved CTCF binding events. (PDF) [file pbio.1001420.s025.pdf]

**Table S5: Diverged and conserved CTCF binding events**

Parameter : 0.4

| Species A    | Species B    | All Binding Events |                          |                    |                       |                                      |                    |                    |
|--------------|--------------|--------------------|--------------------------|--------------------|-----------------------|--------------------------------------|--------------------|--------------------|
|              |              | Total              | Species A binding events |                    |                       |                                      | Species B specific | Binding divergence |
|              |              |                    | All                      | Species A specific | Shared with Species B | Species A centric binding divergence |                    |                    |
| <i>D.mel</i> | <i>D.sim</i> | 2430               | 2267                     | 446                | 1821                  | 19.67%                               | 163                | 25.06%             |
| <i>D.mel</i> | <i>D.yak</i> | 2514               | 2267                     | 660                | 1607                  | 29.11%                               | 247                | 36.08%             |
| <i>D.mel</i> | <i>D.pse</i> | 2382               | 2267                     | 1679               | 588                   | 74.06%                               | 115                | 75.31%             |

| Species A    | Species B    | Two Way Orthologous Binding Events |                          |                    |                       |                                      |                    |                    |
|--------------|--------------|------------------------------------|--------------------------|--------------------|-----------------------|--------------------------------------|--------------------|--------------------|
|              |              | Total                              | Species A binding events |                    |                       |                                      | Species B specific | Binding divergence |
|              |              |                                    | All                      | Species A specific | Shared with Species B | Species A centric binding divergence |                    |                    |
| <i>D.mel</i> | <i>D.sim</i> | 2326                               | 2168                     | 376                | 1792                  | 17.34%                               | 158                | 22.96%             |
| <i>D.mel</i> | <i>D.yak</i> | 2454                               | 2214                     | 621                | 1593                  | 28.05%                               | 240                | 35.09%             |
| <i>D.mel</i> | <i>D.pse</i> | 1165                               | 1075                     | 735                | 340                   | 68.37%                               | 90                 | 70.82%             |

| Species A    | Species B    | Four Way Orthologous Binding Events |                          |                    |                       |                                      |                    |                    |
|--------------|--------------|-------------------------------------|--------------------------|--------------------|-----------------------|--------------------------------------|--------------------|--------------------|
|              |              | Total                               | Species A binding events |                    |                       |                                      | Species B specific | Binding divergence |
|              |              |                                     | All                      | Species A specific | Shared with Species B | Species A centric binding divergence |                    |                    |
| <i>D.mel</i> | <i>D.sim</i> | 1130                                | 1030                     | 157                | 873                   | 15.24%                               | 100                | 22.74%             |
| <i>D.mel</i> | <i>D.yak</i> | 1159                                | 1030                     | 271                | 759                   | 26.31%                               | 129                | 34.51%             |
| <i>D.mel</i> | <i>D.pse</i> | 1116                                | 1030                     | 701                | 329                   | 68.06%                               | 86                 | 70.52%             |

Parameter : 0.35

| Species A    | Species B    | All Binding Events |                          |                    |                       |                                      |                    |                    |
|--------------|--------------|--------------------|--------------------------|--------------------|-----------------------|--------------------------------------|--------------------|--------------------|
|              |              | Total              | Species A binding events |                    |                       |                                      | Species B specific | Binding divergence |
|              |              |                    | All                      | Species A specific | Shared with Species B | Species A centric binding divergence |                    |                    |
| <i>D.mel</i> | <i>D.sim</i> | 2713               | 2544                     | 496                | 2048                  | 19.50%                               | 169                | 24.51%             |
| <i>D.mel</i> | <i>D.yak</i> | 2808               | 2544                     | 742                | 1802                  | 29.17%                               | 264                | 35.83%             |
| <i>D.mel</i> | <i>D.pse</i> | 2683               | 2544                     | 1817               | 727                   | 71.42%                               | 139                | 72.90%             |

| Species A    | Species B    | Two Way Orthologous Binding Events |                          |                    |                       |                                      |                    |                    |
|--------------|--------------|------------------------------------|--------------------------|--------------------|-----------------------|--------------------------------------|--------------------|--------------------|
|              |              | Total                              | Species A binding events |                    |                       |                                      | Species B specific | Binding divergence |
|              |              |                                    | All                      | Species A specific | Shared with Species B | Species A centric binding divergence |                    |                    |
| <i>D.mel</i> | <i>D.sim</i> | 2602                               | 2437                     | 420                | 2017                  | 17.23%                               | 165                | 22.48%             |
| <i>D.mel</i> | <i>D.yak</i> | 2745                               | 2490                     | 701                | 1789                  | 28.15%                               | 255                | 34.83%             |
| <i>D.mel</i> | <i>D.pse</i> | 1334                               | 1222                     | 797                | 425                   | 65.22%                               | 112                | 68.14%             |

| Species A    | Species B    | Four Way Orthologous Binding Events |                          |                    |                       |                                      |                    |                    |
|--------------|--------------|-------------------------------------|--------------------------|--------------------|-----------------------|--------------------------------------|--------------------|--------------------|
|              |              | Total                               | Species A binding events |                    |                       |                                      | Species B specific | Binding divergence |
|              |              |                                     | All                      | Species A specific | Shared with Species B | Species A centric binding divergence |                    |                    |
| <i>D.mel</i> | <i>D.sim</i> | 1280                                | 1176                     | 183                | 993                   | 15.56%                               | 104                | 22.42%             |
| <i>D.mel</i> | <i>D.yak</i> | 1314                                | 1176                     | 316                | 860                   | 26.87%                               | 138                | 34.55%             |
| <i>D.mel</i> | <i>D.pse</i> | 1284                                | 1176                     | 763                | 413                   | 64.88%                               | 108                | 67.83%             |

Parameter : 0.5

| Species A    | Species B    | All Binding Events |                          |                    |                       |                                      |                    |                    |
|--------------|--------------|--------------------|--------------------------|--------------------|-----------------------|--------------------------------------|--------------------|--------------------|
|              |              | Total              | Species A binding events |                    |                       |                                      | Species B specific | Binding divergence |
|              |              |                    | All                      | Species A specific | Shared with Species B | Species A centric binding divergence |                    |                    |
| <i>D.mel</i> | <i>D.sim</i> | 2046               | 1913                     | 389                | 1524                  | 20.33%                               | 133                | 25.51%             |
| <i>D.mel</i> | <i>D.yak</i> | 2143               | 1913                     | 547                | 1366                  | 28.59%                               | 230                | 36.26%             |
| <i>D.mel</i> | <i>D.pse</i> | 2005               | 1913                     | 1470               | 443                   | 76.84%                               | 92                 | 77.91%             |

| Species A    | Species B    | Two Way Orthologous Binding Events |                          |                    |                       |                                      |                    |                    |
|--------------|--------------|------------------------------------|--------------------------|--------------------|-----------------------|--------------------------------------|--------------------|--------------------|
|              |              | Total                              | Species A binding events |                    |                       |                                      | Species B specific | Binding divergence |
|              |              |                                    | All                      | Species A specific | Shared with Species B | Species A centric binding divergence |                    |                    |
| <i>D.mel</i> | <i>D.sim</i> | 1953                               | 1824                     | 322                | 1502                  | 17.65%                               | 129                | 23.09%             |
| <i>D.mel</i> | <i>D.yak</i> | 2086                               | 1865                     | 510                | 1355                  | 27.35%                               | 221                | 35.04%             |
| <i>D.mel</i> | <i>D.pse</i> | 959                                | 889                      | 644                | 245                   | 72.44%                               | 70                 | 74.45%             |

| Species A    | Species B    | Four Way Orthologous Binding Events |                          |                    |                       |                                      |                    |                    |
|--------------|--------------|-------------------------------------|--------------------------|--------------------|-----------------------|--------------------------------------|--------------------|--------------------|
|              |              | Total                               | Species A binding events |                    |                       |                                      | Species B specific | Binding divergence |
|              |              |                                     | All                      | Species A specific | Shared with Species B | Species A centric binding divergence |                    |                    |
| <i>D.mel</i> | <i>D.sim</i> | 927                                 | 850                      | 137                | 713                   | 16.12%                               | 77                 | 23.09%             |
| <i>D.mel</i> | <i>D.yak</i> | 971                                 | 850                      | 212                | 638                   | 24.94%                               | 121                | 34.29%             |
| <i>D.mel</i> | <i>D.pse</i> | 918                                 | 850                      | 614                | 236                   | 72.24%                               | 68                 | 74.29%             |

Parameter : 1.0

| Species A    | Species B    | All Binding Events |                          |                    |                       |                                      |                    |                    |
|--------------|--------------|--------------------|--------------------------|--------------------|-----------------------|--------------------------------------|--------------------|--------------------|
|              |              | Total              | Species A binding events |                    |                       |                                      | Species B specific | Binding divergence |
|              |              |                    | All                      | Species A specific | Shared with Species B | Species A centric binding divergence |                    |                    |
| <i>D.mel</i> | <i>D.sim</i> | 1250               | 1169                     | 251                | 918                   | 21.47%                               | 81                 | 26.56%             |
| <i>D.mel</i> | <i>D.yak</i> | 1297               | 1169                     | 350                | 819                   | 29.94%                               | 128                | 36.85%             |
| <i>D.mel</i> | <i>D.pse</i> | 1229               | 1169                     | 947                | 212                   | 81.01%                               | 60                 | 81.94%             |

| Species A    | Species B    | Two Way Orthologous Binding Events |                          |                    |                       |                                      |                    |                    |
|--------------|--------------|------------------------------------|--------------------------|--------------------|-----------------------|--------------------------------------|--------------------|--------------------|
|              |              | Total                              | Species A binding events |                    |                       |                                      | Species B specific | Binding divergence |
|              |              |                                    | All                      | Species A specific | Shared with Species B | Species A centric binding divergence |                    |                    |
| <i>D.mel</i> | <i>D.sim</i> | 1194                               | 1118                     | 208                | 910                   | 18.60%                               | 76                 | 23.79%             |
| <i>D.mel</i> | <i>D.yak</i> | 1262                               | 1142                     | 329                | 813                   | 28.81%                               | 120                | 35.58%             |
| <i>D.mel</i> | <i>D.pse</i> | 565                                | 524                      | 406                | 118                   | 77.48%                               | 41                 | 79.12%             |

| Species A    | Species B    | Four Way Orthologous Binding Events |                          |                    |                       |                                      |                    |                    |
|--------------|--------------|-------------------------------------|--------------------------|--------------------|-----------------------|--------------------------------------|--------------------|--------------------|
|              |              | Total                               | Species A binding events |                    |                       |                                      | Species B specific | Binding divergence |
|              |              |                                     | All                      | Species A specific | Shared with Species B | Species A centric binding divergence |                    |                    |
| <i>D.mel</i> | <i>D.sim</i> | 543                                 | 499                      | 93                 | 406                   | 18.64%                               | 44                 | 25.23%             |
| <i>D.mel</i> | <i>D.yak</i> | 558                                 | 499                      | 141                | 358                   | 28.26%                               | 59                 | 35.84%             |
| <i>D.mel</i> | <i>D.pse</i> | 539                                 | 499                      | 385                | 114                   | 77.15%                               | 40                 | 78.85%             |

Note: the pairwise binding divergence reported in the maintext are calculated as the percentage of *D. melanogaster* binding events (in the table, Species A ) that is diverged from each of the non-*D. melanogaster* species (in the table, Species B) using parameter 0.4. 0.4 is a parameter derived empirically from a permutation-simulation procedure. 0.35 is a less stringent parameter while 0.5 , 1.0 are more stringent parameters. All binding events refer to all possible binding events identified in our pipeline; Two Way orthologous binding events are those binding events in regions where the pair wise DNA sequence identity >50%; Four way orthologous binding events are those binding events in regions where the DNA sequence identity between each pair >50%.
