# Supplementary material for: Adaptive Evolution and the Birth of CTCF Binding Sites in the Drosophila Genome
Source: PLoS Biol. 2012 Nov 6;10(11):e1001420. doi: 10.1371/journal.pbio.1001420 (PMC3491045; doi:10.1371/journal.pbio.1001420)
Supplement: Table S6 — Diverged and conserved CTCF binding events at high-sequence coverage sites. (PDF) [file pbio.1001420.s026.pdf]

**Table S6: Diverged and conserved CTCF binding events at high sequence coverage sites**

Parameter : 0.4

| Species A    | Species B    | All Binding Events |                          |                    |                       |                                      |                    |                    |
|--------------|--------------|--------------------|--------------------------|--------------------|-----------------------|--------------------------------------|--------------------|--------------------|
|              |              | Total              | Species A binding events |                    |                       |                                      | Species B specific | Binding divergence |
|              |              |                    | All                      | Species A specific | Shared with Species B | Species A centric binding divergence |                    |                    |
| <i>D.mel</i> | <i>D.sim</i> | 2261               | 2107                     | 347                | 1760                  | 16.47%                               | 154                | 22.16%             |
| <i>D.mel</i> | <i>D.yak</i> | 2326               | 2094                     | 525                | 1569                  | 25.07%                               | 232                | 32.55%             |
| <i>D.mel</i> | <i>D.pse</i> | 1593               | 1492                     | 1019               | 473                   | 68.30%                               | 101                | 70.31%             |

| Species A    | Species B    | Two Way Orthologous Binding Events |                          |                    |                       |                                      |                    |                    |
|--------------|--------------|------------------------------------|--------------------------|--------------------|-----------------------|--------------------------------------|--------------------|--------------------|
|              |              | Total                              | Species A binding events |                    |                       |                                      | Species B specific | Binding divergence |
|              |              |                                    | All                      | Species A specific | Shared with Species B | Species A centric binding divergence |                    |                    |
| <i>D.mel</i> | <i>D.sim</i> | 2233                               | 2082                     | 338                | 1744                  | 16.23%                               | 151                | 21.90%             |
| <i>D.mel</i> | <i>D.yak</i> | 2295                               | 2067                     | 509                | 1558                  | 24.63%                               | 228                | 32.11%             |
| <i>D.mel</i> | <i>D.pse</i> | 1058                               | 979                      | 653                | 326                   | 66.70%                               | 79                 | 69.19%             |

| Species A    | Species B    | Four Way Orthologous Binding Events |                          |                    |                       |                                      |                    |                    |
|--------------|--------------|-------------------------------------|--------------------------|--------------------|-----------------------|--------------------------------------|--------------------|--------------------|
|              |              | Total                               | Species A binding events |                    |                       |                                      | Species B specific | Binding divergence |
|              |              |                                     | All                      | Species A specific | Shared with Species B | Species A centric binding divergence |                    |                    |
| <i>D.mel</i> | <i>D.sim</i> | 1106                                | 1010                     | 146                | 864                   | 14.46%                               | 96                 | 21.88%             |
| <i>D.mel</i> | <i>D.yak</i> | 1115                                | 988                      | 237                | 751                   | 23.99%                               | 127                | 32.65%             |
| <i>D.mel</i> | <i>D.pse</i> | 1014                                | 938                      | 622                | 316                   | 66.31%                               | 76                 | 68.84%             |

Parameter : 0.35

| Species A    | Species B    | All Binding Events |                          |                    |                       |                                      |                    |                    |
|--------------|--------------|--------------------|--------------------------|--------------------|-----------------------|--------------------------------------|--------------------|--------------------|
|              |              | Total              | Species A binding events |                    |                       |                                      | Species B specific | Binding divergence |
|              |              |                    | All                      | Species A specific | Shared with Species B | Species A centric binding divergence |                    |                    |
| <i>D.mel</i> | <i>D.sim</i> | 2542               | 2381                     | 394                | 1987                  | 16.55%                               | 161                | 21.83%             |
| <i>D.mel</i> | <i>D.yak</i> | 2610               | 2362                     | 600                | 1762                  | 25.40%                               | 248                | 32.49%             |
| <i>D.mel</i> | <i>D.pse</i> | 1805               | 1681                     | 1097               | 584                   | 65.26%                               | 124                | 67.65%             |

| Species A    | Species B    | Two Way Orthologous Binding Events |                          |                    |                       |                                      |                    |                    |
|--------------|--------------|------------------------------------|--------------------------|--------------------|-----------------------|--------------------------------------|--------------------|--------------------|
|              |              | Total                              | Species A binding events |                    |                       |                                      | Species B specific | Binding divergence |
|              |              |                                    | All                      | Species A specific | Shared with Species B | Species A centric binding divergence |                    |                    |
| <i>D.mel</i> | <i>D.sim</i> | 2506                               | 2348                     | 379                | 1969                  | 16.14%                               | 158                | 21.43%             |
| <i>D.mel</i> | <i>D.yak</i> | 2574                               | 2332                     | 581                | 1751                  | 24.91%                               | 242                | 31.97%             |
| <i>D.mel</i> | <i>D.pse</i> | 1201                               | 1101                     | 697                | 404                   | 63.31%                               | 100                | 66.36%             |

| Species A    | Species B    | Four Way Orthologous Binding Events |                          |                    |                       |                                      |                    |                    |
|--------------|--------------|-------------------------------------|--------------------------|--------------------|-----------------------|--------------------------------------|--------------------|--------------------|
|              |              | Total                               | Species A binding events |                    |                       |                                      | Species B specific | Binding divergence |
|              |              |                                     | All                      | Species A specific | Shared with Species B | Species A centric binding divergence |                    |                    |
| <i>D.mel</i> | <i>D.sim</i> | 1255                                | 1154                     | 169                | 985                   | 14.64%                               | 101                | 21.51%             |
| <i>D.mel</i> | <i>D.yak</i> | 1260                                | 1125                     | 275                | 850                   | 24.44%                               | 135                | 32.54%             |
| <i>D.mel</i> | <i>D.pse</i> | 1156                                | 1059                     | 666                | 393                   | 62.89%                               | 97                 | 66.00%             |

Parameter : 0.5

| Species A    | Species B    | All Binding Events |                          |                    |                       |                                      |                    |                    |
|--------------|--------------|--------------------|--------------------------|--------------------|-----------------------|--------------------------------------|--------------------|--------------------|
|              |              | Total              | Species A binding events |                    |                       |                                      | Species B specific | Binding divergence |
|              |              |                    | All                      | Species A specific | Shared with Species B | Species A centric binding divergence |                    |                    |
| <i>D.mel</i> | <i>D.sim</i> | 1890               | 1764                     | 296                | 1468                  | 16.78%                               | 126                | 22.33%             |
| <i>D.mel</i> | <i>D.yak</i> | 1979               | 1765                     | 434                | 1331                  | 24.59%                               | 214                | 32.74%             |
| <i>D.mel</i> | <i>D.pse</i> | 1327               | 1246                     | 889                | 357                   | 71.35%                               | 81                 | 73.10%             |

| Species A    | Species B    | Two Way Orthologous Binding Events |                          |                    |                       |                                      |                    |                    |
|--------------|--------------|------------------------------------|--------------------------|--------------------|-----------------------|--------------------------------------|--------------------|--------------------|
|              |              | Total                              | Species A binding events |                    |                       |                                      | Species B specific | Binding divergence |
|              |              |                                    | All                      | Species A specific | Shared with Species B | Species A centric binding divergence |                    |                    |
| <i>D.mel</i> | <i>D.sim</i> | 1865                               | 1742                     | 286                | 1456                  | 16.42%                               | 123                | 21.93%             |
| <i>D.mel</i> | <i>D.yak</i> | 1950                               | 1741                     | 419                | 1322                  | 24.07%                               | 209                | 32.21%             |
| <i>D.mel</i> | <i>D.pse</i> | 869                                | 806                      | 574                | 232                   | 71.22%                               | 63                 | 73.30%             |

| Species A    | Species B    | Four Way Orthologous Binding Events |                          |                    |                       |                                      |                    |                    |
|--------------|--------------|-------------------------------------|--------------------------|--------------------|-----------------------|--------------------------------------|--------------------|--------------------|
|              |              | Total                               | Species A binding events |                    |                       |                                      | Species B specific | Binding divergence |
|              |              |                                     | All                      | Species A specific | Shared with Species B | Species A centric binding divergence |                    |                    |
| <i>D.mel</i> | <i>D.sim</i> | 907                                 | 832                      | 125                | 707                   | 15.02%                               | 75                 | 22.05%             |
| <i>D.mel</i> | <i>D.yak</i> | 936                                 | 817                      | 183                | 634                   | 22.40%                               | 119                | 32.26%             |
| <i>D.mel</i> | <i>D.pse</i> | 830                                 | 769                      | 545                | 224                   | 70.87%                               | 61                 | 73.01%             |

Parameter : 1.0

| Species A    | Species B    | All Binding Events |                          |                    |                       |                                      |                    |                    |
|--------------|--------------|--------------------|--------------------------|--------------------|-----------------------|--------------------------------------|--------------------|--------------------|
|              |              | Total              | Species A binding events |                    |                       |                                      | Species B specific | Binding divergence |
|              |              |                    | All                      | Species A specific | Shared with Species B | Species A centric binding divergence |                    |                    |
| <i>D.mel</i> | <i>D.sim</i> | 1158               | 1158                     | 203                | 879                   | 17.53%                               | 76                 | 24.09%             |
| <i>D.mel</i> | <i>D.yak</i> | 1192               | 1192                     | 281                | 791                   | 23.57%                               | 120                | 33.64%             |
| <i>D.mel</i> | <i>D.pse</i> | 796                | 796                      | 572                | 172                   | 71.86%                               | 52                 | 78.39%             |

| Species A    | Species B    | Two Way Orthologous Binding Events |                          |                    |                       |                                      |                    |                    |
|--------------|--------------|------------------------------------|--------------------------|--------------------|-----------------------|--------------------------------------|--------------------|--------------------|
|              |              | Total                              | Species A binding events |                    |                       |                                      | Species B specific | Binding divergence |
|              |              |                                    | All                      | Species A specific | Shared with Species B | Species A centric binding divergence |                    |                    |
| <i>D.mel</i> | <i>D.sim</i> | 1140                               | 1069                     | 193                | 876                   | 18.05%                               | 71                 | 23.16%             |
| <i>D.mel</i> | <i>D.yak</i> | 1175                               | 1061                     | 274                | 787                   | 25.82%                               | 114                | 33.02%             |
| <i>D.mel</i> | <i>D.pse</i> | 516                                | 481                      | 368                | 113                   | 76.51%                               | 35                 | 78.10%             |

| Species A    | Species B    | Four Way Orthologous Binding Events |                          |                    |                       |                                      |                    |                    |
|--------------|--------------|-------------------------------------|--------------------------|--------------------|-----------------------|--------------------------------------|--------------------|--------------------|
|              |              | Total                               | Species A binding events |                    |                       |                                      | Species B specific | Binding divergence |
|              |              |                                     | All                      | Species A specific | Shared with Species B | Species A centric binding divergence |                    |                    |
| <i>D.mel</i> | <i>D.sim</i> | 534                                 | 491                      | 89                 | 402                   | 18.13%                               | 43                 | 24.72%             |
| <i>D.mel</i> | <i>D.yak</i> | 539                                 | 481                      | 125                | 356                   | 25.99%                               | 58                 | 33.95%             |
| <i>D.mel</i> | <i>D.pse</i> | 491                                 | 457                      | 347                | 110                   | 75.93%                               | 34                 | 77.60%             |

Note: All items and sub-tables are all in the same formats as in Table S4. The number of conserved and diverged binding events reported here at different parameters are obtained from our analysis pipeline with an additional filtering of input sample sequence coverage at the identified peak sites  $>0.5$ . The final results of percentage of binding divergence remain the same as in Table S4
