# Supplementary material for: Adaptive Evolution and the Birth of CTCF Binding Sites in the Drosophila Genome
Source: PLoS Biol. 2012 Nov 6;10(11):e1001420. doi: 10.1371/journal.pbio.1001420 (PMC3491045; doi:10.1371/journal.pbio.1001420)
Supplement: Table S7 — CTCF binding divergence estimated by direct comparison. (PDF) [file pbio.1001420.s027.pdf]

**Table S7: CTCF Binding divergence estimated by direct comparison***D. melanogaster* centric

| Species A    | Species B    |       |                                |                               |                       |
|--------------|--------------|-------|--------------------------------|-------------------------------|-----------------------|
|              |              | Total | Conserved<br>with Species<br>B | Diverged<br>with Species<br>B | binding<br>divergence |
| <i>D.mel</i> | <i>D.sim</i> | 2182  | 1424                           | 758                           | 34.74%                |
| <i>D.mel</i> | <i>D.yak</i> | 2182  | 1483                           | 699                           | 32.03%                |
| <i>D.mel</i> | <i>D.pse</i> | 2182  | 353                            | 1829                          | 83.82%                |

*non-D.melanogaster* centric

| Species A    | Species B    |       |                                |                               |                       |
|--------------|--------------|-------|--------------------------------|-------------------------------|-----------------------|
|              |              | Total | Conserved<br>with Species<br>B | Diverged<br>with Species<br>B | binding<br>divergence |
| <i>D.sim</i> | <i>D.mel</i> | 2197  | 1381                           | 816                           | 37.14%                |
| <i>D.yak</i> | <i>D.mel</i> | 2993  | 1497                           | 1496                          | 49.98%                |
| <i>D.pse</i> | <i>D.mel</i> | 2332  | 388                            | 1944                          | 83.36%                |

Note: for the "*D. melanogaster* centric" subtable, we mapped each non-*D. melanogaster* species binding sites back to *D. melanogaster* genome using LiftOver, and calculated the percentage of *D. melanogaster* binding sites that are not overlapping with any non-*D. melanogaster* LiftOver binding sites for each species pair as estimate of binding divergence. For the "non-*D. melanogaster* centric" subtable, we mapped the *D. melanogaster* binding sites to each non-*D. melanogaster* species genome using LiftOver, and calculated the percentage of non-*D. melanogaster* binding sites that are not overlapping with any *D. melanogaster* LiftOver binding sites for each pair as estimate of binding divergence.
