# Supplementary material for: Adaptive Evolution and the Birth of CTCF Binding Sites in the Drosophila Genome
Source: PLoS Biol. 2012 Nov 6;10(11):e1001420. doi: 10.1371/journal.pbio.1001420 (PMC3491045; doi:10.1371/journal.pbio.1001420)
Supplement: Table S10 — Summary of Twist binding divergence estimated using different methods. (PDF) [file pbio.1001420.s030.pdf]

**Table S10: Summary of Twist Binding divergence estimated using different methods**

|                   | Pvalue 10-5 | Pvalue 10-10 | Pvalue 10-15 | All   | TWOB  | FWOB  |
|-------------------|-------------|--------------|--------------|-------|-------|-------|
| <i>D.mel</i> rep1 | 0           | 0            | 0            | 0     | 0     | 0     |
| <i>D.mel</i> rep2 | 2%          | 6%           | 13%          |       |       |       |
| <i>D.sim</i> rep1 | 18%         | 29%          | 41%          | 39.7% | 37.8% | 36.9% |
| <i>D.sim</i> rep2 | 3%          | 52%          | 68%          |       |       |       |
| <i>D.yak</i> rep1 | 19%         | 28%          | 36%          | 37.2% | 36.8% | 36.4% |
| <i>D.yak</i> rep2 | 22%         | 34%          | 43%          |       |       |       |
| <i>D.pse</i> rep1 | 40%         | 48%          | 53%          | 59.2% | 53.3% | 53.2% |
| <i>D.pse</i> rep2 | 42%         | 53%          | 59%          |       |       |       |
| offset 20kb       | 87%         | 93%          | 95%          | NA    | NA    | NA    |

Note: the divergence rate in column 2,3,4 are calculated from the conservation rate obtained from He *et al.* paper. These conservation rates were estimated by comparing the binding site sets identified using different P value cutoffs in other species to the high stringent binding site set identified in the *D. melanogaster* reference replicate (here *D. mel* rep1). Column 4,5,6 are the conservation rate estimated by applying our methods to the Twist data. We found that our estimates of conservation rate is generally higher than He *et al.* method, and consistent with the estimate variations as well as False Negative Rate (1- offset estimate) observed using their method between replicates for each species.
