# Supplementary material for: Adaptive Evolution and the Birth of CTCF Binding Sites in the Drosophila Genome
Source: PLoS Biol. 2012 Nov 6;10(11):e1001420. doi: 10.1371/journal.pbio.1001420 (PMC3491045; doi:10.1371/journal.pbio.1001420)
Supplement: Table S11 — Genomic distribution of different evolutionary groups of CTCF binding events. (PDF) [file pbio.1001420.s031.pdf]

**Table S11: Genomic distribution of different evolutionary groups of CTCF binding events**

| Boolean<br>conservation score | Genomic position |            |          |        |
|-------------------------------|------------------|------------|----------|--------|
|                               | promoter         | intergenic | intronic | exonic |
| ( 1,1,1,1 )                   | 131              | 76         | 56       | 22     |
| (1,1,1,0 )                    | 188              | 89         | 117      | 27     |
| (1,1,0,1)                     | 9                | 4          | 7        | 1      |
| (1,0,1,1)                     | 0                | 3          | 2        | 0      |
| (1,1,0,0 )                    | 66               | 36         | 35       | 9      |
| (1,0,1,0)                     | 24               | 8          | 10       | 4      |
| (1,0,0,1)                     | 7                | 3          | 3        | 4      |
| (1,0,0,0 )                    | 38               | 15         | 29       | 7      |
| Total                         | 463              | 234        | 259      | 74     |
