# Supplementary material for: Adaptive Evolution and the Birth of CTCF Binding Sites in the Drosophila Genome
Source: PLoS Biol. 2012 Nov 6;10(11):e1001420. doi: 10.1371/journal.pbio.1001420 (PMC3491045; doi:10.1371/journal.pbio.1001420)
Supplement: Table S12 — Parsimonious age dating of D. melanogaster CTCF binding events. (PDF) [file pbio.1001420.s032.pdf]

**Table S12: Parsimonious age dating of *D. melanogaster* CTCF binding events**

| Boolean Conservation Score | Parsimony Reconstruction of Binding Events Evolutionary History                                                                                    | Age of <i>D.mel</i> binding |
|----------------------------|----------------------------------------------------------------------------------------------------------------------------------------------------|-----------------------------|
| ( 1,1,1,1 )                | exist in the ancestor of the species                                                                                                               | >25 Myr                     |
| (1,1,1,0 )                 | exist in the ancestor , one loss event in the branch of <i>D.pseudoobscura</i>                                                                     | >25 Myr                     |
|                            | one gain event after the split of <i>D.pse</i> and <i>melanogaster</i> group but before the split of <i>D.yak</i> and <i>melanogaster</i> subgroup | >6Myr, <25Myr               |
| (1,1,0,1)                  | exist in ancestor , one loss event in the branch of <i>D.yak</i>                                                                                   | >25Myr                      |
| (1,0,1,1)                  | exist in ancestor, one loss event in the branch of <i>D.sim</i>                                                                                    | >25Myr                      |
| (1,1,0,0 )                 | one gain event after the split of <i>D.yak</i> and the <i>melanogaster</i> subgroup but before split of <i>D.sim</i> and <i>D.mel</i>              | >2.5Myr , <6Myr             |
| (1,0,1,0)                  | one gain in the branch of <i>D.mel</i> , one gain in the branch of <i>D.yak</i>                                                                    | <2.5Myr                     |
|                            | exist in ancestor, one loss in <i>D.pse</i> , one loss in <i>D.sim</i>                                                                             | >25Myr                      |
| (1,0,0,1)                  | one gain in the branch of <i>D.mel</i> , one gain in the branch of <i>D.pse</i>                                                                    | <2.5Myr                     |
|                            | exist in ancestor, one loss in <i>D.yak</i> , one loss in <i>D.sim</i>                                                                             | >25Myr                      |
| (1,0,0,0 )                 | one gain in the branch of <i>D.mel</i>                                                                                                             | <2.5Myr                     |
