# Supplementary material for: Adaptive Evolution and the Birth of CTCF Binding Sites in the Drosophila Genome
Source: PLoS Biol. 2012 Nov 6;10(11):e1001420. doi: 10.1371/journal.pbio.1001420 (PMC3491045; doi:10.1371/journal.pbio.1001420)
Supplement: Table S15 — Number of fixed and polymorphic mutations in CTCF-associated DNA sequences at high-sequence coverage sites. (PDF) [file pbio.1001420.s035.pdf]

**Table S15: Number of fixed and polymorphic mutations in CTCF associated DNA sequences at high sequence coverage sites**

Using *D.simulans* as outgroup

| CTCF associated DNA |                    | Fixed | Polymorphism | F:P  |
|---------------------|--------------------|-------|--------------|------|
|                     | all binding        | 27465 | 11435        | 2.40 |
|                     | TWOB               | 24732 | 10831        | 2.28 |
|                     | Conserved TWOB     | 20219 | 9072         | 2.23 |
| 201bp region        | Diverged TWOB      | 4513  | 1759         | 2.57 |
|                     | FWOB               | 7862  | 4560         | 1.72 |
|                     | Old FWOB           | 5657  | 3424         | 1.65 |
|                     | Young FWOB         | 823   | 356          | 2.31 |
|                     |                    |       |              |      |
|                     | all binding        | 4648  | 2221         | 2.09 |
|                     | TWOB               | 4347  | 2141         | 2.03 |
|                     | Conserved TWOB     | 3608  | 1823         | 1.98 |
| motif region        | Diverged TWOB      | 875   | 349          | 2.51 |
|                     | FWOB               | 1492  | 952          | 1.57 |
|                     | Old FWOB           | 1088  | 721          | 1.51 |
|                     | Young FWOB         | 140   | 51           | 2.75 |
|                     |                    |       |              |      |
| Neutral control     | Syn sites of genes | 67149 | 36385        | 1.85 |

Using *D.yakuba* as outgroup

| CTCF Associated DNA |                    | Fixed  | Polymorphism | F:P  |
|---------------------|--------------------|--------|--------------|------|
|                     | all binding        | 59994  | 11480        | 5.23 |
|                     | TWOB               | 53512  | 10641        | 5.03 |
|                     | Conserved TWOB     | 39417  | 8235         | 4.79 |
| 201bp region        | Diverged TWOB      | 14095  | 2406         | 5.86 |
|                     | FWOB               | 17765  | 4510         | 3.94 |
|                     | Old FWOB           | 12832  | 3386         | 3.79 |
|                     | Young FWOB         | 1678   | 352          | 4.77 |
|                     |                    |        |              |      |
|                     | all binding        | 10219  | 2241         | 4.56 |
|                     | TWOB               | 9261   | 2109         | 4.39 |
|                     | Conserved TWOB     | 6833   | 1665         | 4.10 |
| motif region        | Diverged TWOB      | 2428   | 444          | 5.47 |
|                     | FWOB               | 3414   | 948          | 3.60 |
|                     | Old FWOB           | 2471   | 717          | 3.45 |
|                     | Young FWOB         | 288    | 51           | 5.65 |
|                     |                    |        |              |      |
| Neutral control     | Syn sites of genes | 182759 | 46702        | 3.91 |
